# Supplementary material for: Underwater superoleophobic palygorskite coated meshes for efficient oil/water separation
Source: Royal Society of Chemistry journal article supplement (doi:10.1039/c5ta02870a), 2015-01-01
Supplement: c5ta02870a1.pdf [file c5ta02870a1.pdf]

Electronic Supplementary Information

**Underwater superoleophobic palygorskite coated mesh for the  
efficient oil/water separation**

Jian Li <sup>\*</sup>, Long Yan, Wenfang Hu, Weijun Li, Fei Zha, Ziqiang Lei

Key Laboratory of Eco-Environment-Related Polymer Materials, Ministry of  
Education of China, Key Laboratory of Gansu Polymer Materials, College of  
Chemistry and Chemical Engineering, Northwest Normal University, Lanzhou  
730070, China

Corresponding author email: jianli83@126.com;

### **Supplementary figure and movie captions:**

**Figure S1.** FE-SEM images of the palygorskite.

**Figure S2.** Photographs of water (a) and (b) oil droplets on the palygorskite coated mesh in air with the contact angles close to zero.

**Figure S3.** Oil droplet (chloroform) on the palygorskite coated mesh underwater with a contact angle of  $158 \pm 1^\circ$  and a sliding angle of  $8^\circ$ .

**Movie S1.** The separation process of oil (kerosene)/water mixture based on the underwater superoleophobic palygorskite coated meshes.

**Movie S2.** The separation process of kerosene/1M HCl solution mixture based on the underwater superoleophobic palygorskite coated meshes.

**Movie S3.** The separation process of kerosene/1M NaOH solution mixture based on the underwater superoleophobic palygorskite coated meshes.

**Movie S4.** The separation process of kerosene/1M NaCl solution mixture based on the underwater superoleophobic palygorskite coated meshes.

**Movie S5.** The separation process of kerosene/hot water mixture based on the underwater superoleophobic palygorskite coated meshes.

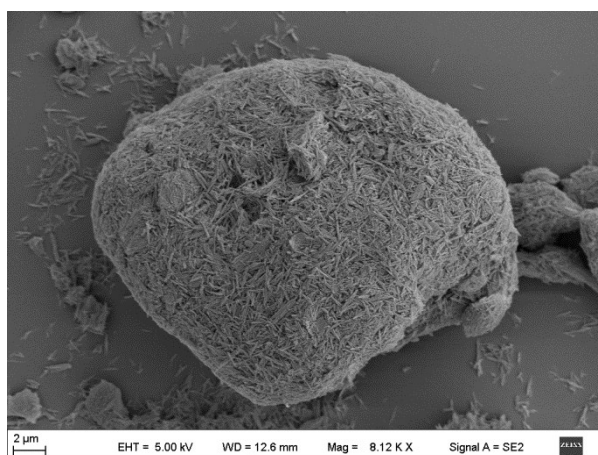

**Figure S1.** FE-SEM images of the palygorskite.

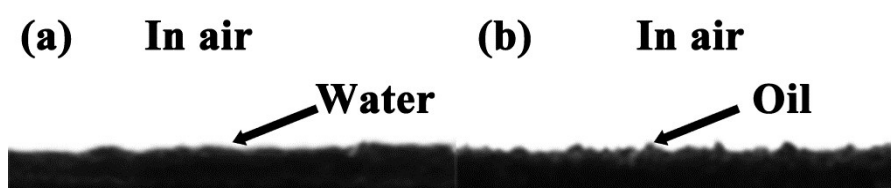

**Figure S2.** Photographs of water (a) and (b) oil droplets on the palygorskite coated mesh in air with the contact angles close to zero.

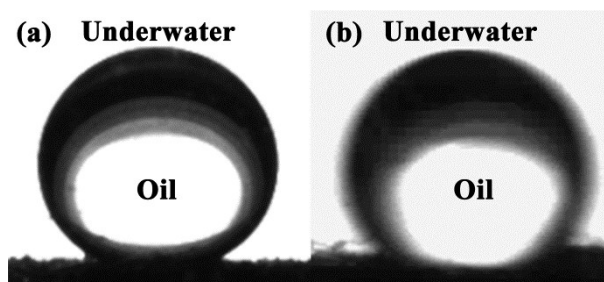

**Figure S3.** Oil droplet (chloroform) on the palygorskite coated mesh underwater with a contact angle of  $158 \pm 1^\circ$  and a sliding angle of  $8^\circ$ .
